# Supplementary material
Source: publisher figshare collection journal article supplement (https://tandf.figshare.com/ndownloader/files/22714889)
Supplement: Supplementary file 1 [file 22714889]

**Table S1. Subgroup analysis of stable NVG group<sup>a</sup>**

|                               | stable NVG (n=26)                      |                                      | PACG group<br>(n=18)                  | P value <sup>b</sup> |
|-------------------------------|----------------------------------------|--------------------------------------|---------------------------------------|----------------------|
|                               | NVG with inactive NVI<br>group (n= 17) | completely stable<br>group (n=9)     |                                       |                      |
| <b>IOP</b><br><b>(mmHg)</b>   | 29.88±5.68<br>(21.0-45.0, n=17)        | 11.70±2.66<br>(9.0-16.3, n=9)        | 29.41±10.30<br>(19.1-52.0, n=18)      | <b>&lt;0.001</b>     |
| <b>VEGF</b><br><b>(pg/ml)</b> | 254.36±55.57<br>(141.70-344.67, n=17)  | 261.70±41.77<br>(199.60-331.14, n=7) | 279.18±37.80<br>(223.73-349.44, n=15) | 0.334                |
| <b>IL-8</b><br><b>(pg/ml)</b> | 73.87±10.89<br>(55.87-90.84, n=15)     | 76.40±11.05<br>(59.72-94.73, n=9)    | 74.96±13.88<br>(49.35-95.05, n=18)    | 0.887                |
| <b>EPO</b><br><b>(mIU/ml)</b> | 17.93±2.57<br>(14.33-21.76, n=15)      | 16.72±3.69<br>(10.97-20.03, n=9)     | 17.29±2.38<br>(12.96-20.90, n=18)     | 0.574                |

a To determine the effects of IOP on cytokine concentrations in stable NVG group, we divided the stable NVG group into NVG with inactive NVI group (IOP≥21mmHg) and completely stable group (IOP<21mmHg), based on their IOP levels.

b ANOVA test was conducted for multigroup comparison, significant difference was accepted at P<0.05 and bold values represent significance. Subgroup comparisons were made by LSD method, the IOP in completely stable group was significantly lower than the NVG with inactive NVI and PACG groups (all P<0.001).
